# Supplementary material for: Secondary metabolite biosynthetic diversity in the fungal family Hypoxylaceae and Xylaria hypoxylon
Source: PubMed Central journal article supplement (PMC8403587; doi:10.1016/j.simyco.2021.100118), 2021-08-26
Supplement: mmc3.pdf [file mmc3.pdf]

## SUPPLEMENTARY INFORMATION

### Secondary metabolite biosynthetic diversity in the fungal family *Hypoxylaceae* and *Xylaria hypoxylon*

Eric Kuhnert<sup>1,\*</sup>, Jorge C. Navarro-Muñoz<sup>2</sup>, Kevin Becker<sup>1,3</sup>, Marc Stadler<sup>3</sup>, Jérôme Collemare<sup>2</sup>, Russell J. Cox<sup>1</sup>

1 Centre of Biomolecular Drug Research (BMWZ), Institute for Organic Chemistry, Leibniz University Hannover, Schneiderberg 38, 30167, Hannover, Germany

2 Westerdijk Fungal Biodiversity Institute, Uppsalalaan 8, 3584 CT, Utrecht, The Netherlands

3 Department Microbial Drugs, Helmholtz Centre for Infection Research (HZI), and German Centre for Infection Research (DZIF), partner site Hannover-Braunschweig, Inhoffenstrasse 7, 38124 Braunschweig, Germany

\*Correspondence: Eric Kuhnert, eric.kuhnert@oci.uni-hannover.de

#### Table of Contents

|                                |         |
|--------------------------------|---------|
| Supplementary tables (S1-S5)   | Page 2  |
| Supplementary figures (S1-S16) | Page 6  |
| References                     | Page 20 |

**Table S1:** Reference protein sequences used for phylogenetic reconstruction of Flavin-dependent monooxygenases involved in azaphilone biosynthesis.

| <b>Protein Acc. No.</b> | <b>protein name</b>                                                        | <b>organism</b>                    | <b>Reference</b>                |
|-------------------------|----------------------------------------------------------------------------|------------------------------------|---------------------------------|
| A6T923                  | FAD-dependent urate hydroxylase HpxO                                       | <i>Klebsiella pneumoniae</i>       | (O'Leary <i>et al.</i> 2009)    |
| Q0D1P1                  | FAD-dependent monooxygenase TerC (terrein biosynthesis) - reannotated      | <i>Aspergillus terreus</i>         | (Zaehle <i>et al.</i> 2014)     |
| A0A2U8U2L4              | FAD-dependent monooxygenase AsL4 (xenovulene A biosynthesis)               | <i>Sarocladium sp.</i>             | (Schor <i>et al.</i> 2018)      |
| A0A2U8U2L0              | FAD-dependent monooxygenase AsL6 (xenovulene A biosynthesis)               | <i>Sarocladium sp.</i>             | (Schor <i>et al.</i> 2018)      |
| A0A1Y0BRF9              | FAD-dependent monooxygenase AdrH (andrastin biosynthesis)                  | <i>Penicillium roqueforti</i>      | (Rojas-Aedo <i>et al.</i> 2017) |
| Q4WLD1                  | FAD-dependent monooxygenase Pyr5 (pyripyropene biosynthesis)               | <i>Aspergillus fumigatus</i>       | (Itoh <i>et al.</i> 2010)       |
| Q0C9L4                  | FAD-dependent monooxygenase CtvC (citreoviridin biosynthesis)              | <i>Aspergillus terreus</i>         | (Lin <i>et al.</i> 2016)        |
| H1VM35                  | FAD-dependent monooxygenase DpchE (higginsianin biosynthesis)              | <i>Colletotrichum higginsianum</i> | (Tsukada <i>et al.</i> 2020)    |
| A0A3B1EFQ2              | FAD-dependent monooxygenase Str9 (strobilurin A biosynthesis)              | <i>Strobilurus tenacellus</i>      | (Nofiani <i>et al.</i> 2018)    |
| Q0CJ62                  | 6-methylsalicylic acid decarboxylase AtA (terreic acid biosynthesis)       | <i>Aspergillus terreus</i>         | (Guo <i>et al.</i> 2014)        |
| n/a                     | FAD-dependent monooxygenase MrPigN (azaphilone biosynthesis)               | <i>Monascus ruber</i>              | (Chen <i>et al.</i> 2017)       |
| G3XMC2                  | FAD-dependent monooxygenase AzaH (azanigerone biosynthesis)                | <i>Aspergillus niger</i>           | (Zabala <i>et al.</i> 2012)     |
| A2QTE7                  | FAD-dependent monooxygenase Orf3 (pestalamide biosynthesis)                | <i>Aspergillus niger</i>           | (Wang <i>et al.</i> 2018)       |
| QNC49734                | FAD-dependent monooxygenase Hfaza1D (azaphilone biosynthesis)              | <i>Hypoxylon fragiforme</i>        | (Becker <i>et al.</i> 2021)     |
| B6HN76                  | FAD-dependent monooxygenase SorC (sorbicillinoid biosynthesis)             | <i>Penicillium rubens</i>          | (Kahlert <i>et al.</i> 2020)    |
| G0R6T0                  | FAD-dependent monooxygenase Sor5 (sorbicillinoid biosynthesis)             | <i>Trichoderma reesei</i>          | (Derntl <i>et al.</i> 2017)     |
| Q5B8A3                  | FAD-dependent monooxygenase PkfD (aspernidine A biosynthesis)              | <i>Aspergillus nidulans</i>        | (Yaegashi <i>et al.</i> 2013)   |
| A0A084B9Z5              | FAD-dependent monooxygenase SAT7 (satratoxin biosynthesis)                 | <i>Stachybotrys chartarum</i>      | (Semeiks <i>et al.</i> 2014)    |
| Q5BEJ7                  | FAD-dependent monooxygenase AfoD (asperfuranone biosynthesis)              | <i>Aspergillus nidulans</i>        | (Chiang <i>et al.</i> 2009)     |
| n/a                     | FAD-dependent monooxygenase CazL (chaetoviridin biosynthesis)              | <i>Chaetomium globosum</i>         | (Winter <i>et al.</i> 2012)     |
| A0A4V1E8I5              | FAD-dependent monooxygenase EupB (eupenifeldin biosynthesis)               | <i>Phoma sp.</i>                   | (Zhai <i>et al.</i> 2019)       |
| A0A2U8U2L6              | Alicylate hydroxylase AsL1 (xenovulene A biosynthesis)                     | <i>Sarocladium sp.</i>             | (Schor <i>et al.</i> 2018)      |
| Q5AUX8                  | FAD-dependent monooxygenase Dbah (Derivative of benzaldehyde biosynthesis) | <i>Aspergillus nidulans</i>        | (Gerke <i>et al.</i> 2012)      |

|          |                                                               |                               |                              |
|----------|---------------------------------------------------------------|-------------------------------|------------------------------|
| B8M9J8   | FAD-dependent monooxygenase TropB (tropolone biosynthesis)    | <i>Talaromyces stipitatus</i> | (Davison <i>et al.</i> 2012) |
| QNC49728 | FAD-dependent monooxygenase Hfaza2D (azaphilone biosynthesis) | <i>Hypoxylon fragiforme</i>   | (Becker <i>et al.</i> 2021)  |

**Table S2:** Reference protein sequences used for phylogenetic reconstruction of NRPS-like proteins with A-T-TE.

| Protein Acc. No. | protein name                                    | organism                    | Reference                      |
|------------------|-------------------------------------------------|-----------------------------|--------------------------------|
| B8NTZ9           | Piperazines biosynthesis cluster protein A LnaA | <i>Aspergillus flavus</i>   | (Forseth <i>et al.</i> 2013)   |
| Q0CU19           | Butyrolactone IIa synthetase BtyA               | <i>Aspergillus terreus</i>  | (Hühner <i>et al.</i> 2018)    |
| Q5B7T4           | Microperfurane synthase MicA                    | <i>Aspergillus nidulans</i> | (Yeh <i>et al.</i> 2012)       |
| B7STY1           | Atromentin synthetase AtrA                      | <i>Tapinella panuoides</i>  | (Schneider <i>et al.</i> 2008) |
| I6NXV7           | Atromentin synthetase GreA                      | <i>Suillus grevillei</i>    | (Wackler <i>et al.</i> 2012)   |
| A0A0S1RUN4       | Atromentin synthetase InvA2                     | <i>Paxillus involutus</i>   | (Braesel <i>et al.</i> 2015)   |
| A0A0S2E7Z1       | Atromentin synthetase InvA1                     | <i>Paxillus involutus</i>   | (Braesel <i>et al.</i> 2015)   |
| A7XRY0           | Didemethylasterriquinone D synthetase TdiA      | <i>Aspergillus nidulans</i> | (Balibar <i>et al.</i> 2007)   |
| AUO29226         | Phenguignaric acid synthetase PgnA              | <i>Aspergillus terreus</i>  | (Hühner <i>et al.</i> 2018)    |
| Q0CWD0           | Aspulvinone E synthase ApvA                     | <i>Aspergillus terreus</i>  | (Hühner <i>et al.</i> 2018)    |
| A0A336U965       | Aspulvinone E synthetase MelA                   | <i>Aspergillus terreus</i>  | (Geib <i>et al.</i> 2016)      |

**Table S3:** Composition of growth media used in the secondary metabolite screening.

| Name                | Ingredient                                       | Conc. [g/L]                 | Notes/instructions |
|---------------------|--------------------------------------------------|-----------------------------|--------------------|
| SMYA (semi-viscous) | Maltose<br>Yeast extract<br>Meat peptone<br>agar | 40.0<br>10.0<br>10.0<br>4.0 | -                  |
| YMG (liquid)        | Malt extract<br>D-glucose<br>Yeast extract       | 10.0<br>4.0<br>4.0          | pH 6.3             |
| YMG + beech chips   | Beech chips                                      | 4.0                         | -                  |
| CYG10 (liquid)      | Corn meal<br>D-glucose                           | 50.0<br>10.0                | -                  |

|                           |                                        |        |                                                           |
|---------------------------|----------------------------------------|--------|-----------------------------------------------------------|
|                           | Yeast extract                          | 1.0    |                                                           |
| GG1 (liquid)              | Glycerol                               | 75.0   | pH 7.5                                                    |
|                           | D-glucose                              | 10.0   |                                                           |
|                           | Yeast autolysate                       | 5.0    |                                                           |
|                           | Soybean meal                           | 5.0    |                                                           |
|                           | Tomato paste                           | 5.0    |                                                           |
|                           | Sodium citrate                         | 2.0    |                                                           |
|                           | NH <sub>4</sub> SO <sub>4</sub>        | 2.0    |                                                           |
| GZ (liquid)               | Oat meal                               | 30.0   | pH 6.5                                                    |
|                           | Corn steep liquor (liq.)               | 10.0   |                                                           |
|                           | Soybean meal                           | 10.0   |                                                           |
| MMK2 (liquid)             | Mannitol                               | 40.0   | -                                                         |
|                           | Yeast extract                          | 5.0    |                                                           |
|                           | Murashoge & Skoop salts                | 4.3    |                                                           |
| MOG (liquid)              | Mannitol                               | 75.0   | pH 6.0                                                    |
|                           | MES                                    | 16.2   |                                                           |
|                           | Oat flour                              | 15.0   |                                                           |
|                           | Yeast extract                          | 5.0    |                                                           |
|                           | L-glutamic acid                        | 4.0    |                                                           |
| Supermalt (liquid)        | Malt extract                           | 50.0   | -                                                         |
|                           | Yeast extract                          | 10.0   |                                                           |
|                           | FeSO <sub>4</sub> × 7 H <sub>2</sub> O | 0.02   |                                                           |
|                           | ZnSO <sub>4</sub> × 7 H <sub>2</sub> O | 0.007  |                                                           |
| BRFT (rice, solid)        | Yeast extract                          | 1.0    | 12 mL "base liquid" solution added to 3.3 g of brown rice |
|                           | Sodium tartrate × 2 H <sub>2</sub> O   | 0.5    |                                                           |
|                           | KH <sub>2</sub> PO <sub>4</sub>        | 0.5    |                                                           |
| Vermiculite + YES (solid) | Sucrose                                | 150.0  | 12 mL YES added to 34 ccm vermiculite (>0.5 cm diam.)     |
|                           | Yeast extract                          | 20.0   |                                                           |
|                           | MgSO <sub>4</sub> × 7 H <sub>2</sub> O | 0.5    |                                                           |
|                           | ZnSO <sub>4</sub> × 7 H <sub>2</sub> O | 0.0001 |                                                           |
|                           | CuSO <sub>4</sub> × 7 H <sub>2</sub> O | 0.001  |                                                           |
| Wheat (solid)             | Disodium tartrate × 2 H <sub>2</sub> O | 10.0   | 8.25 mL "base liquid" added to 5 g of whole wheat grains  |
|                           | Glycerol                               | 2.0    |                                                           |
|                           | Yeast extract                          | 2.0    |                                                           |
|                           | KH <sub>2</sub> PO <sub>4</sub>        | 1.0    |                                                           |
|                           | MgSO <sub>4</sub> × 7 H <sub>2</sub> O | 1.0    |                                                           |
|                           | FeSO <sub>4</sub> × 7 H <sub>2</sub> O | 0.5    |                                                           |

**Tab. S4:** Blastp analysis for the proteins encoded in the ergot alkaloid gene cluster of *Hypomontagnella monticulosa*, *Hypom. spongiphila* and *Annulohyphoxylon truncatum*. The closest hit and its respective query coverage (QC) and identity (Ident) are listed.

| Gene name                          | Closest blastp hit                                            | QC [%] | Ident [%] |
|------------------------------------|---------------------------------------------------------------|--------|-----------|
| <i>Hypomontagnella monticulosa</i> |                                                               |        |           |
| easF                               | easF [ <i>Trichophyton benhamiae</i> CBS 112371], D4AK46.1    | 96     | 63.7      |
| easE                               | easE [ <i>Epichloe festucae</i> var. <i>lolii</i> ], A2TBU3.1 | 97     | 53.1      |
| DMATS                              | DMATS [ <i>Epichloe coenophiala</i> ], Q6X2E2.1               | 99     | 64.8      |
| easG                               | easG [ <i>Epichloe festucae</i> var. <i>lolii</i> ], A2TBU1.1 | 98     | 67.8      |
| easA                               | easA [ <i>Epichloe festucae</i> var. <i>lolii</i> ], A2TBU0.1 | 97     | 71.1      |
| easD                               | easD [ <i>Aspergillus fumigatus</i> ], D3J0Z1.1               | 100    | 72.0      |
| easC                               | easC [ <i>Aspergillus fumigatus</i> Af293], Q4WZ63.1          | 94     | 67.4      |
| <i>Hypomontagnella spongiphila</i> |                                                               |        |           |
| easF                               | easF [ <i>Microsporium canis</i> CBS 113480], C5FTN1.1        | 96     | 64.8      |
| easE                               | easE [ <i>Epichloe festucae</i> var. <i>lolii</i> ], A2TBU3.1 | 97     | 52.5      |
| DMATS                              | DMATS [ <i>Epichloe coenophiala</i> ], Q6X2E2.1               | 95     | 67.1      |

|                                  |                                                               |     |      |
|----------------------------------|---------------------------------------------------------------|-----|------|
| easG                             | easG [ <i>Epichloe festucae</i> var. <i>lolii</i> ], A2TBU1.1 | 98  | 66.7 |
| easA                             | easA [ <i>Epichloe festucae</i> var. <i>lolii</i> ], A2TBU0.1 | 97  | 71.1 |
| easD                             | easD [ <i>Aspergillus fumigatus</i> ], D3JOZ1.1               | 86  | 71.5 |
| easC                             | easC [ <i>Aspergillus fumigatus</i> Af293], Q4WZ63.1          | 94  | 69.7 |
| <i>Annulohypoxyton truncatum</i> |                                                               |     |      |
| lpsA                             | lpsA [ <i>Epichloe festucae</i> var. <i>lolii</i> ], Q96V34.2 | 99  | 64.7 |
| easH                             | easH [ <i>Claviceps purpurea</i> 20.1], G8GV69.1              | 96  | 62.0 |
| easF                             | easF [ <i>Trichophyton benhamiae</i> CBS 112371], D4AK46.1    | 95  | 66.8 |
| DMATS                            | DMATS [ <i>Epichloe coenophiala</i> ], Q6X2E2.1               | 94  | 64.1 |
| easE                             | easE [ <i>Epichloe festucae</i> var. <i>lolii</i> ], A2TBU3.1 | 97  | 55.7 |
| cloA                             | cloA [ <i>Claviceps purpurea</i> ], Q2PBY6.1                  | 100 | 46.2 |
| easG                             | easG [ <i>Epichloe festucae</i> var. <i>lolii</i> ], A2TBU1.1 | 99  | 63.8 |
| easD                             | easD [ <i>Penicillium roqueforti</i> FM164], W6QIM3.1         | 84  | 67.0 |
| easA                             | easA [ <i>Epichloe festucae</i> var. <i>lolii</i> ], A2TBU0.1 | 97  | 67.9 |
| lpsB                             | lpsB [ <i>Epichloe festucae</i> var. <i>lolii</i> ], A2TBU4.1 | 97  | 65.8 |
| easC                             | easC [ <i>Aspergillus fumigatus</i> Af293], Q4WZ63.1          | 96  | 69.0 |

**Tab. S5:** Distribution and host preferences of the analyzed *Hypoxyloaceae* species and *Xylaria hypoxyton*.

| Species                               | Distribution                                        | Host preference                                                                                                                                                                                                                                                                                               |
|---------------------------------------|-----------------------------------------------------|---------------------------------------------------------------------------------------------------------------------------------------------------------------------------------------------------------------------------------------------------------------------------------------------------------------|
| <i>Annulohypoxyton truncatum</i>      | Common in Southern USA, known from Mexico           | Probably <i>Quercus</i> spp.                                                                                                                                                                                                                                                                                  |
| <i>Daldinia concentrica</i>           | very common across most European countries          | Prefers <i>Fraxinus</i> but also occurs on other substrates ( <i>Alnus</i> spp., <i>Populus</i> spp., <i>Betula alba</i> , <i>Quercus pubescens</i> , <i>Acacia cyanophylla</i> , <i>Ulmus minor</i> , <i>Carpinus</i> spp., <i>Acer</i> spp., <i>Fagus sylvatica</i> , <i>Prunus spinosa</i> )               |
| <i>Hypomontagnella monticulosa</i>    | Very common in the tropics                          | unknown                                                                                                                                                                                                                                                                                                       |
| <i>Hypomontagnella spongiphila</i>    | Only one record                                     | sponge                                                                                                                                                                                                                                                                                                        |
| <i>Hypomontagnella submonticulosa</i> | Common in the USA                                   | unknown                                                                                                                                                                                                                                                                                                       |
| <i>Hypoxyton fragiforme</i>           | common in Europe and North America                  | Host specific to <i>Fagus</i> spp.                                                                                                                                                                                                                                                                            |
| <i>Hypoxyton lienhwacheense</i>       | Rare, only known from South-East China and Thailand | unknown                                                                                                                                                                                                                                                                                                       |
| <i>Hypoxyton pulicidum</i>            | supposedly common in the tropics                    | unknown                                                                                                                                                                                                                                                                                                       |
| <i>Hypoxyton rickii</i>               | Known from Argentina, Brasil, Mexico, Caribbean     | unknown                                                                                                                                                                                                                                                                                                       |
| <i>Hypoxyton rubiginosum</i>          | Common across Europe                                | Prefers <i>Fraxinus</i> spp. but also occurs on other substrates ( <i>Fagus sylvatica</i> , <i>Ulmus</i> spp., <i>Populus tremula</i> )                                                                                                                                                                       |
| <i>Jackrogersella multiformis</i>     | common in Europe and North America                  | Host specific to <i>Betula</i> spp.                                                                                                                                                                                                                                                                           |
| <i>Pyrenopolyporus hunteri</i>        | known from various tropical countries               | unknown                                                                                                                                                                                                                                                                                                       |
| <i>Xylaria hypoxyton</i>              | very common in Europe, known from the USA           | No host preference, known from <i>Fagus sylvatica</i> , <i>Fraxinus excelsior</i> , <i>Carpinus betulus</i> , <i>Quercus</i> spp., <i>Populus tremula</i> , <i>Corylus avellana</i> , <i>Tilia cordata</i> , <i>Acer campestre</i> , <i>Picea abies</i> , <i>Salix</i> spp., <i>Lonicera xylosteum</i> , etc. |

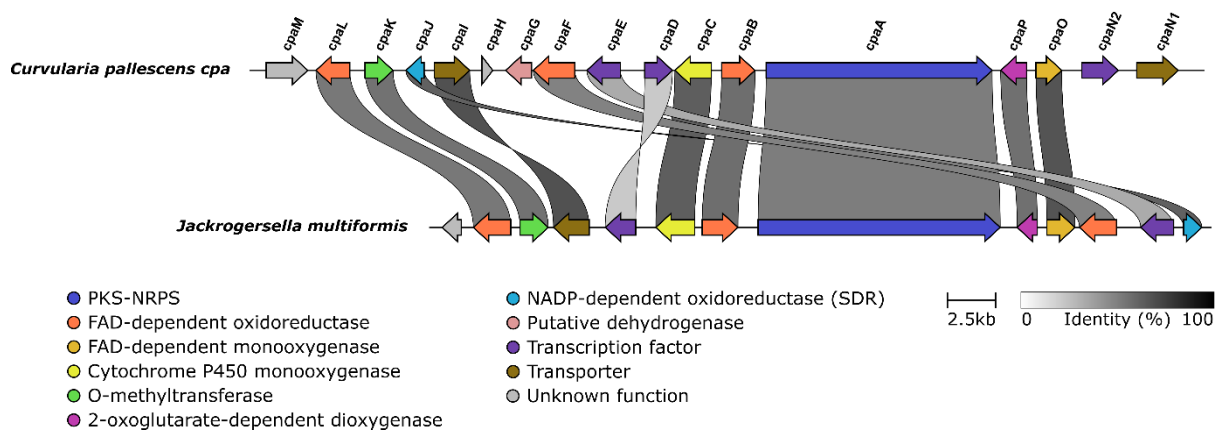

**Fig. S1:** Synteny analysis between the curvupallide biosynthetic gene cluster (*cpa*) of *Curvularia pallescens* and a homologous BGC from *Jackrogersella multiformis* visualized with clinker.

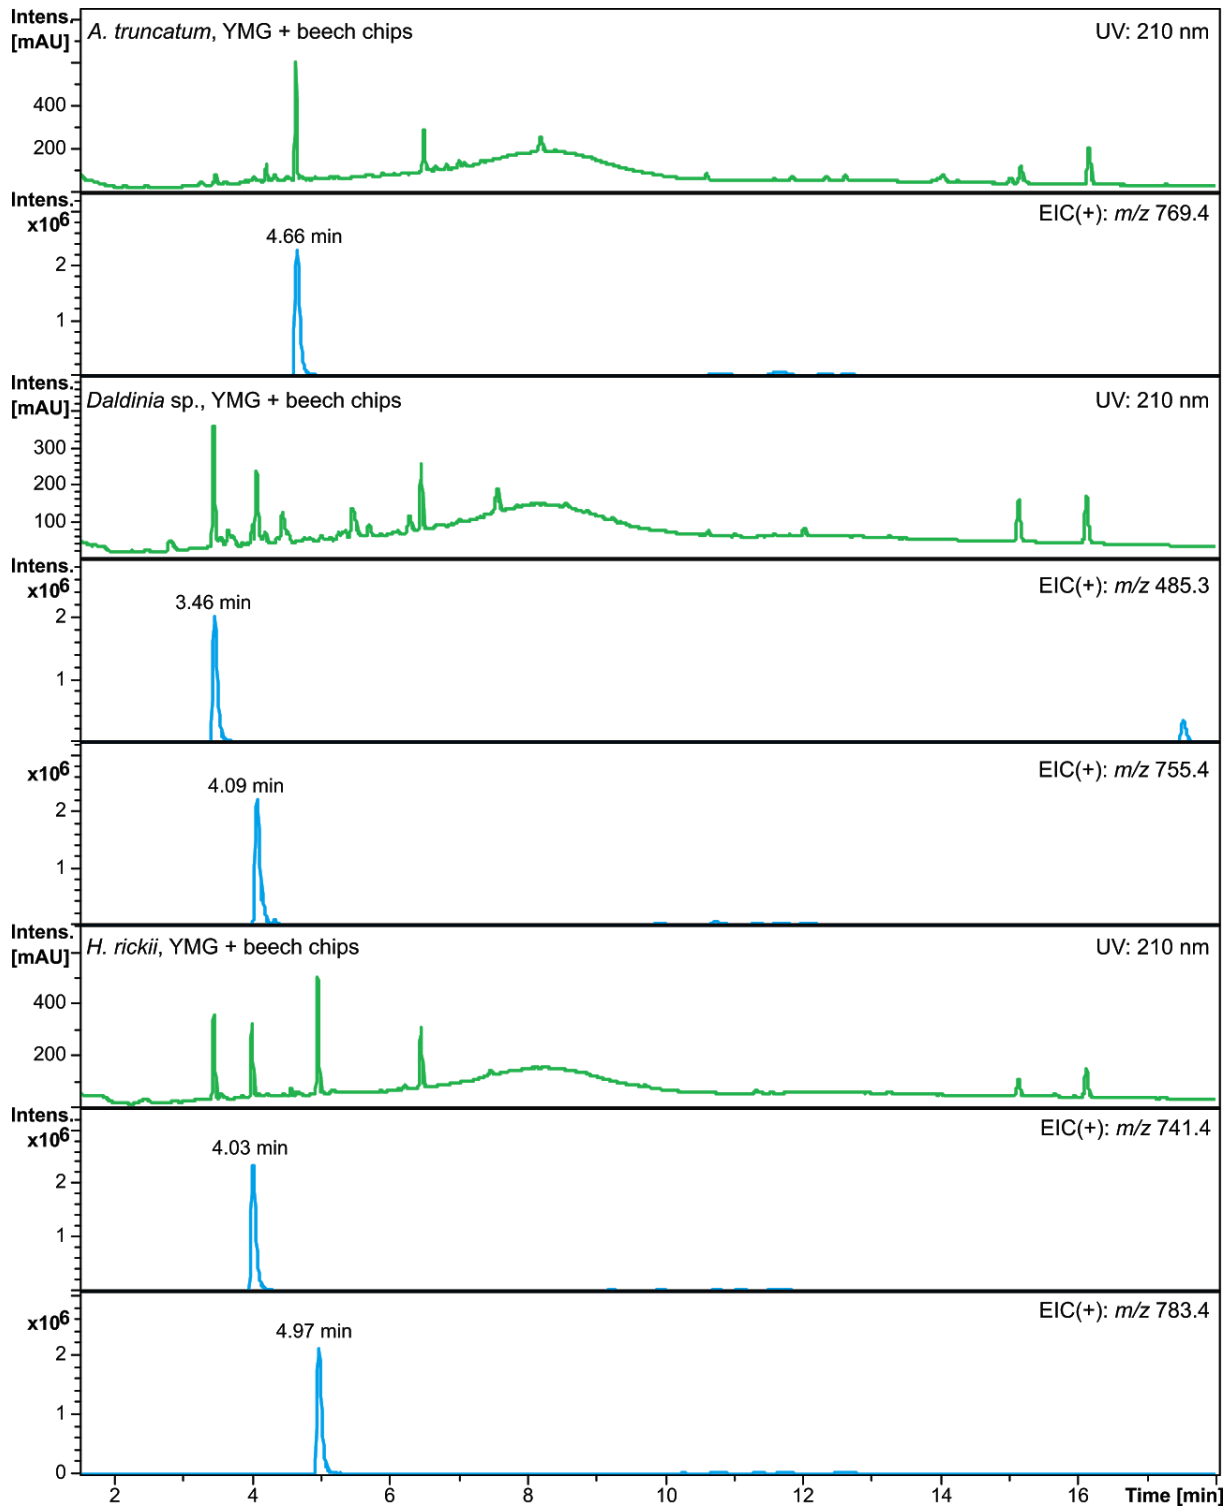

**Fig. S2:** HPLC-UV chromatograms of culture-derived extracts of *Annulohyphoxylon truncatum*, *Daldinia sp.*, and *Hyphoxylon fragiforme* (top panel) and MS spectra of peaks identified as siderophores (bottom, next page). Top: green traces, UV chromatograms; blue traces, extracted ion chromatograms (EICs) of  $m/z$  769.4, 485.3, 755.4, 741.4, and 783.4, representing the  $[M+H]^+$  ions corresponding to coprogen (MW 768.4), dimerumic acid (MW 484.3 Da),  $N^\alpha$ -dimethylcoprogen B (MW 754.4),  $N^\alpha$ -methylcoprogen B (MW 740.4 Da), and  $N^\alpha$ -methylcoprogen (MW 782.4), respectively. Bottom: MS spectra of the respective siderophores .

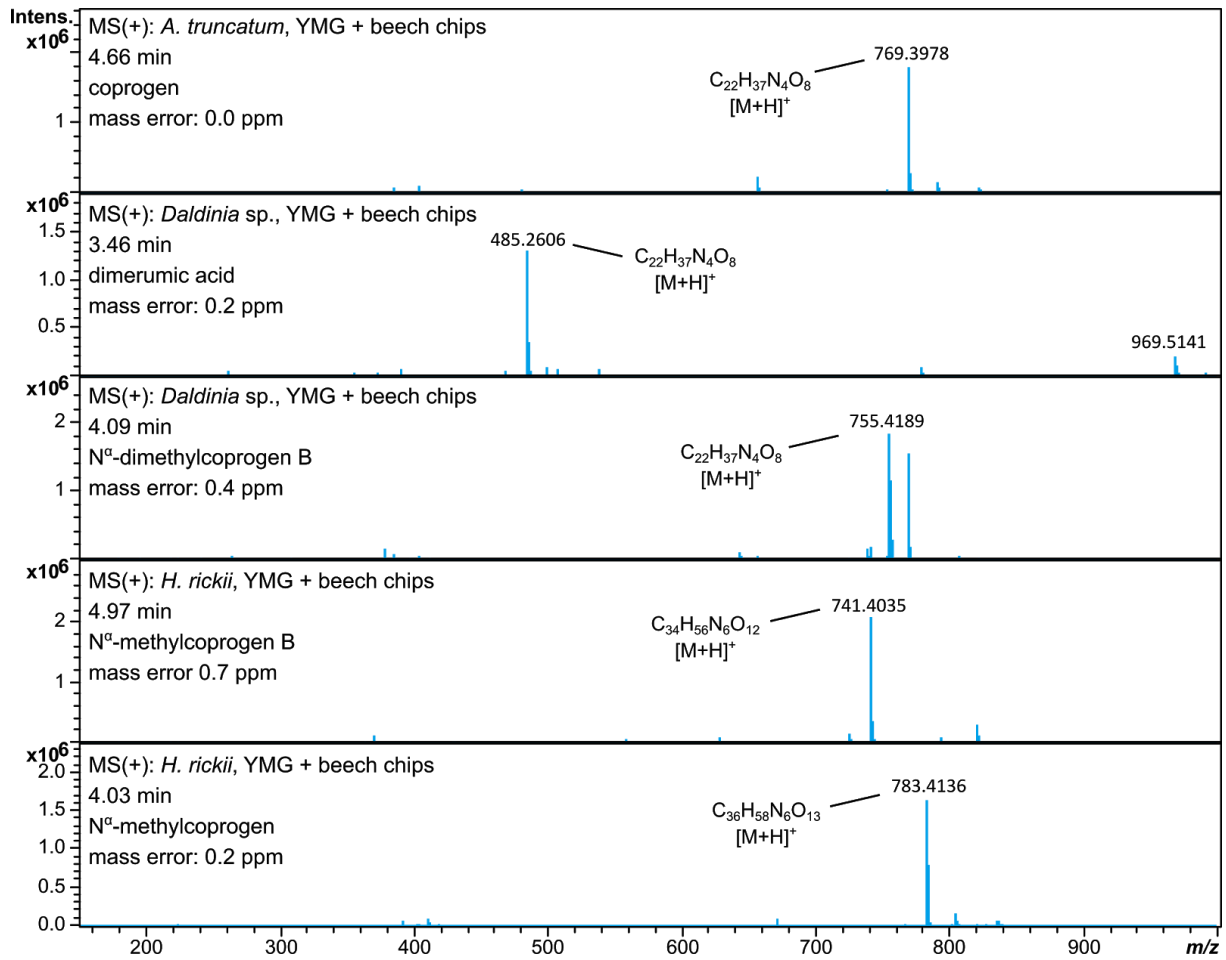

Fig. S2 (continued)

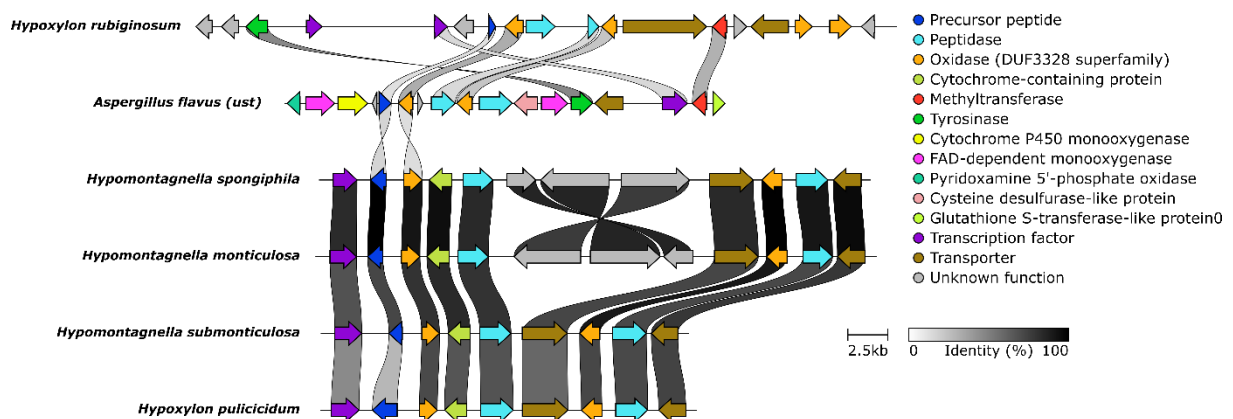

Fig. S3: Synteny analysis between RiPP biosynthetic gene cluster identified in the *Hypoxylaceae* and the ustiloxin B cluster (ust) from *A. flavus* visualized by the clinker tool.



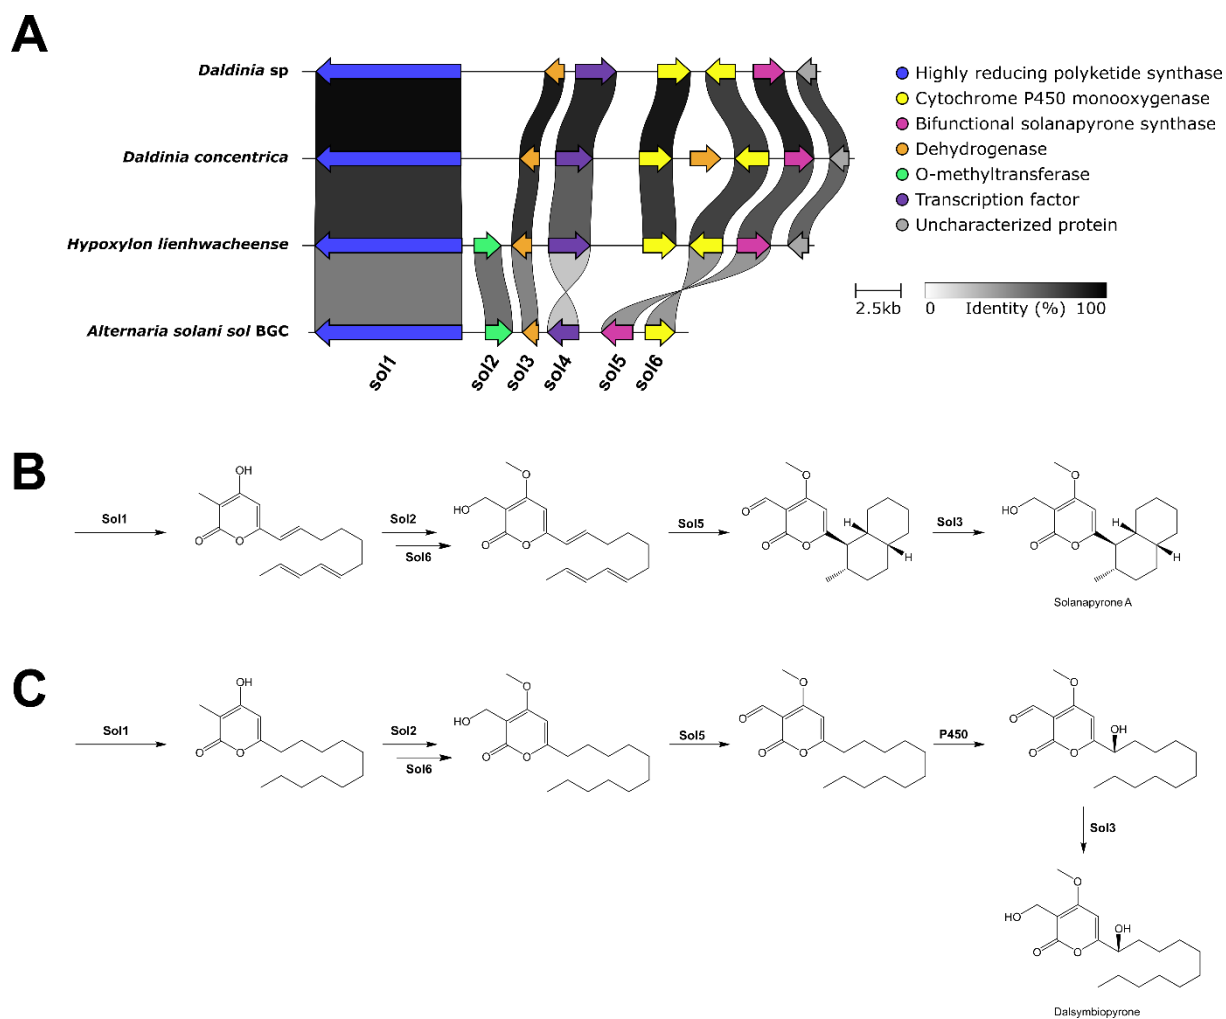

**Fig. S4:** A; Synteny analysis between the solanapyrone biosynthetic gene cluster (*sol* BGC) and related BGCs from the *Hypoxylaceae* visualized with clinker. B, C; Biosynthetic scheme for solanapyrone A according to literature is shown and a putative pathway for the biosynthesis of dalsymbiopyrone by *Hypoxylaceae* species is predicted. BGCs lacking a methyltransferase are predicted to produce a demethylated analog of dalsymbiopyrone.

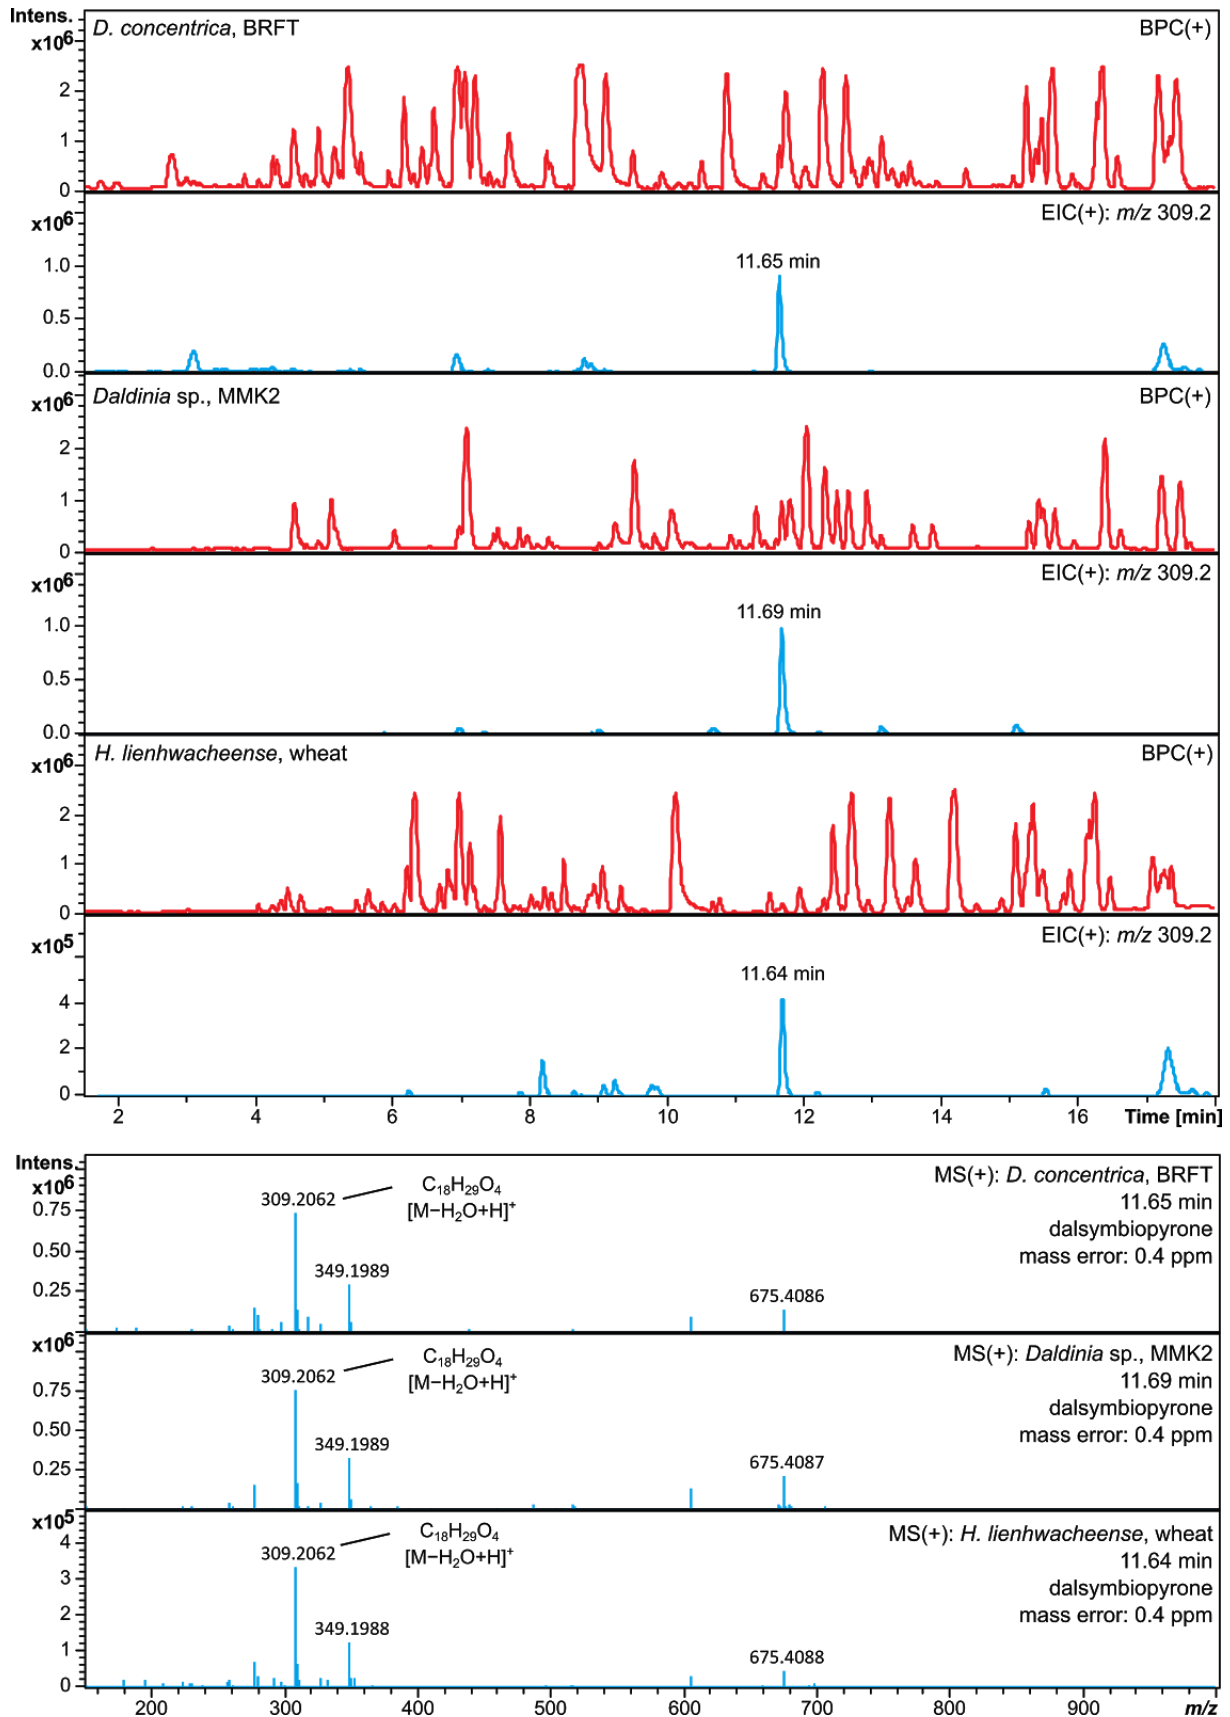

**Fig. S5:** HPLC-MS chromatograms of culture-derived extracts of *Daldinia concentrica*, *Entonaema liquescens*, and *Hypoxylon lienhwacheense* (top panel) and MS spectra of dalsymbiopyrone (bottom). Top: red traces, positive ion mode base peak chromatograms [BPC(+)]; blue traces, extracted ion chromatograms (EICs) of  $m/z$  309.2, representing the  $[M-H_2O+H]^+$  ion corresponding to dalsymbiopyrone (MW 326.2 Da). Bottom: MS spectra of dalsymbiopyrone.

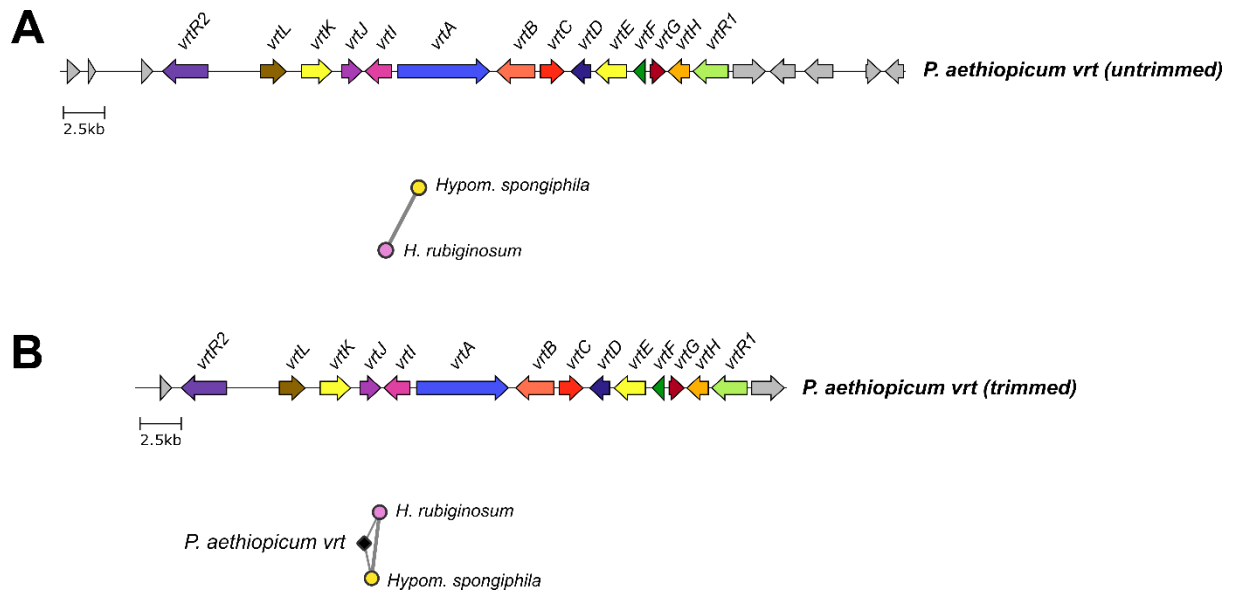

**Fig. S6:** Impact of uncurated reference biosynthetic gene cluster (BGC) on subnetwork formation during BiG-SCAPE analysis. A; uncurated BGC information of the viridicatumtoxin BGC (*vrt*) from *Penicillium aethiopicum* retrieved from the MIBiG repository prevents BiG-SCAPE subnetwork formation with homologous BGCs from the *Hypoxylaceae* genomes under global mode settings and a cutoff value of 0.4. B; Manual curation (trimming) of the *vrt* BGC results in subnetwork formation of the three homologous viridicatumtoxin BGCs.

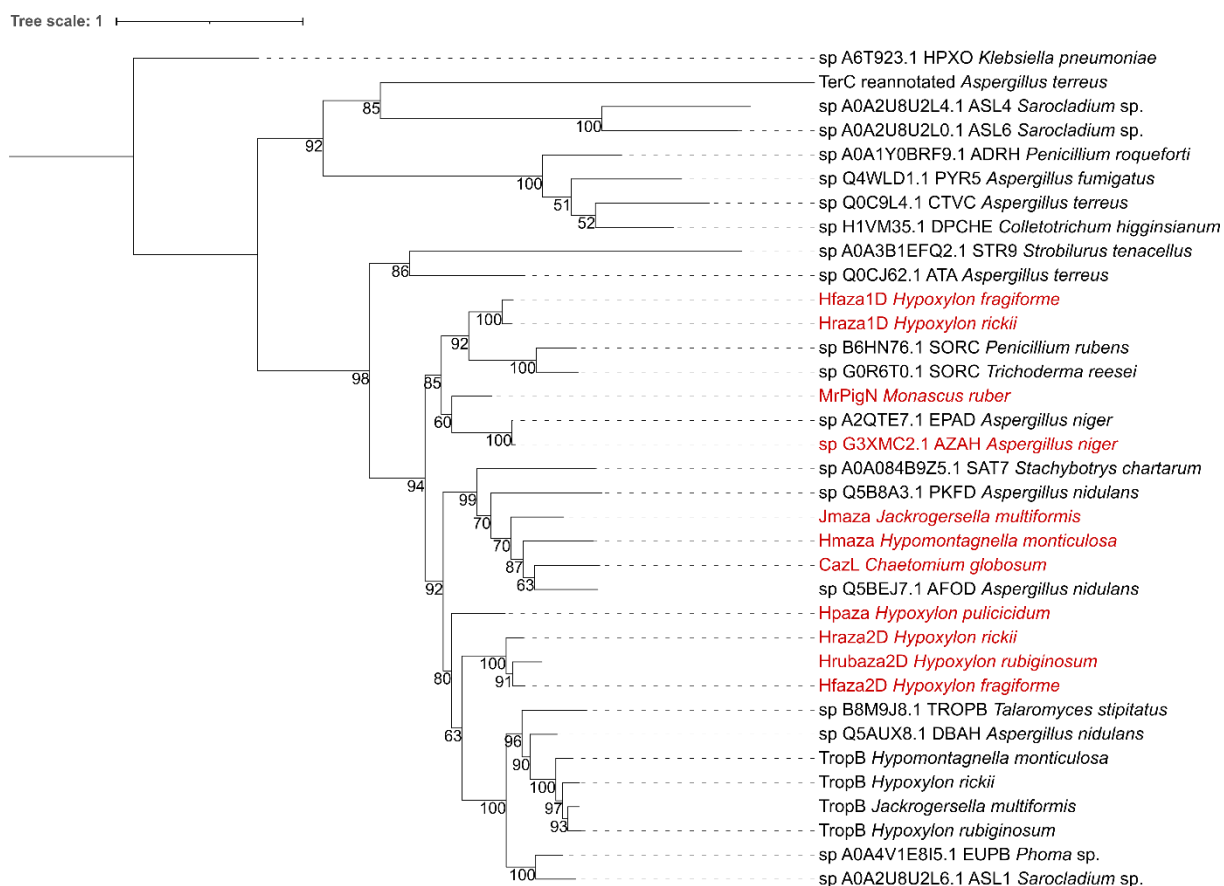

**Fig. S7:** Maximum-Likelihood phylogenetic analysis of FAD-dependent monooxygenases known from azaphilone biosynthetic pathways (red) and other characterized FAD-dependent monooxygenases (black). Tree is rooted with the FAD-dependent urate hydroxylase (HPXO) from *Klebsiella pneumoniae*. Branch support was determined with the ultrafast bootstrap approximation. Support values [%] above 50 % are indicated. Only support values above 95 % are deemed significant. Available GenBank accession numbers are given.

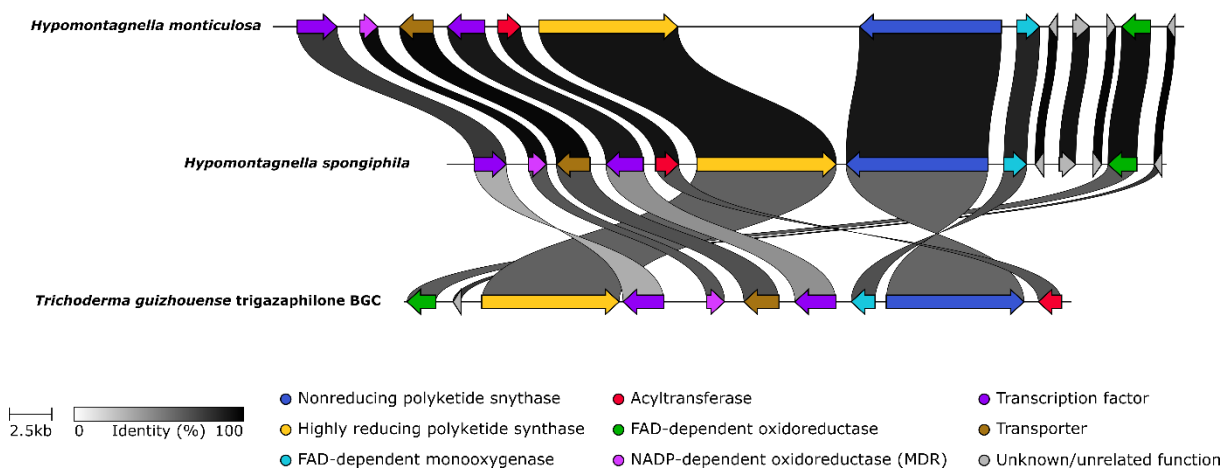

**Fig. S8:** Synteny analysis between the trigazaphilone biosynthetic gene cluster from *Trichoderma guizhouense* and its homologs from *Hypomontagnella monticulosa* and *Hypom. spongiphila* visualized by the clinker tool.

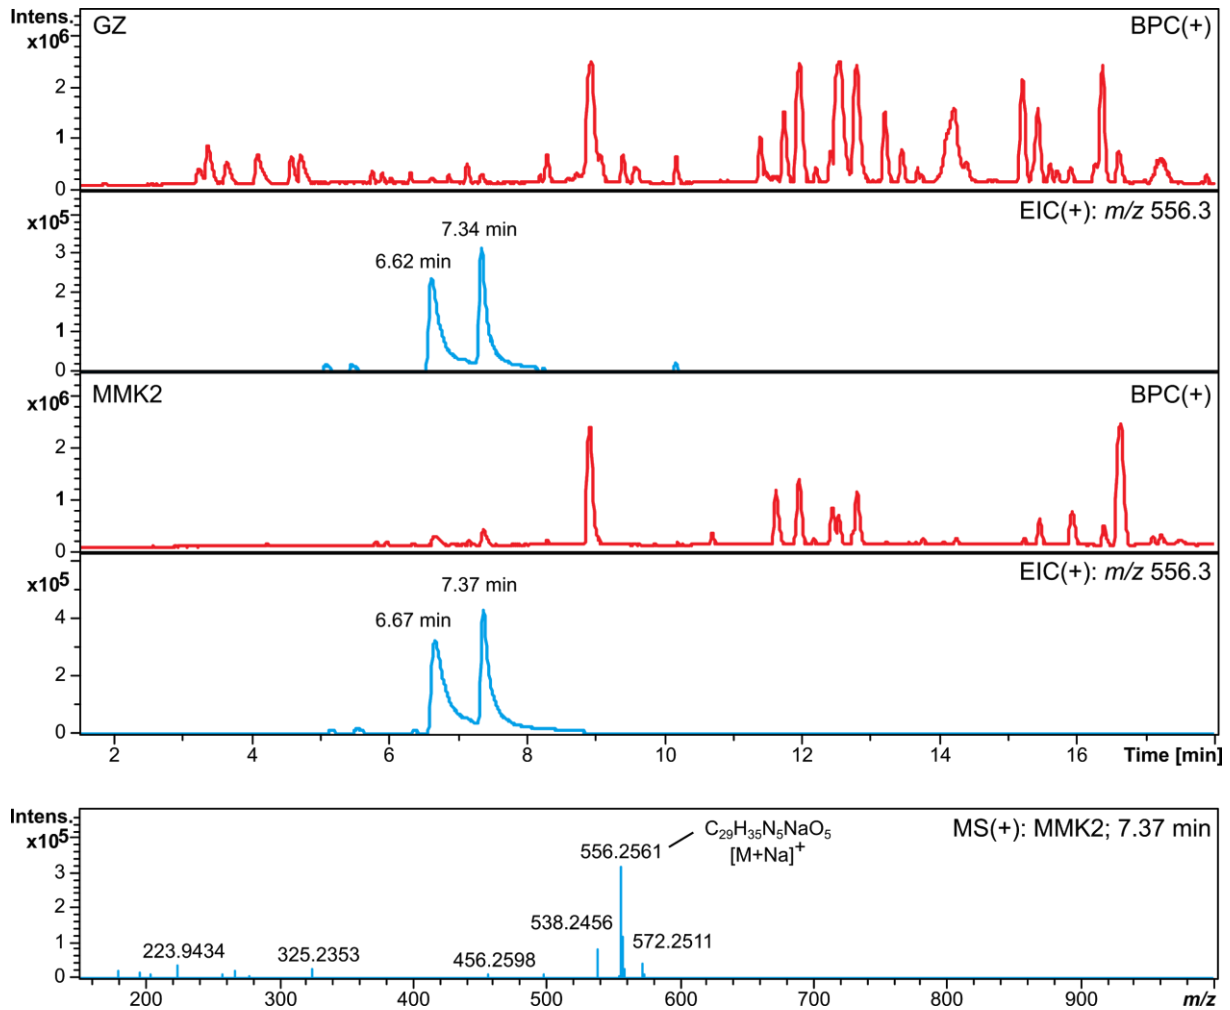

**Fig. S9:** HPLC-MS chromatograms of culture-derived extracts of *Annulohyphoxylon truncatum* (top panel) and representative MS spectrum of a peak tentatively identified as ergovaline (bottom). Top: red traces, positive ion mode base peak chromatograms [BPC(+)]; blue traces, extracted ion chromatograms [EIC(+)] of  $m/z$  556.3, representing the  $[M+Na]^+$  ion corresponding to ergovaline (MW 533.3 Da). Bottom: representative MS spectrum of ergovaline (tentatively identified, ion formula accuracy: 5.5 ppm).

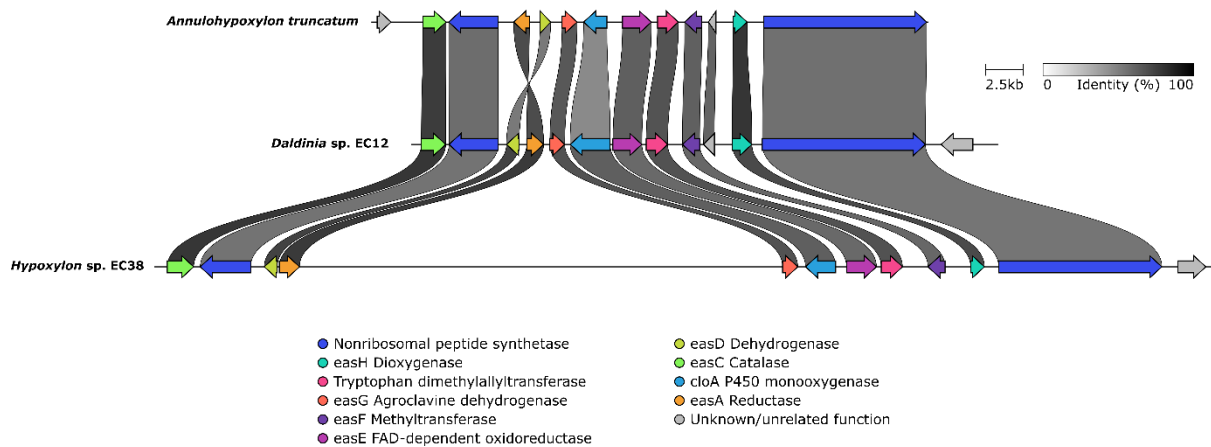

**Fig. S10:** Synteny analysis between the ergopeptine biosynthetic gene cluster identified from *A. truncatum*, *Hypoxyton* sp. EC38 and *Daldinia* sp. EC12 visualized by the clinker tool.

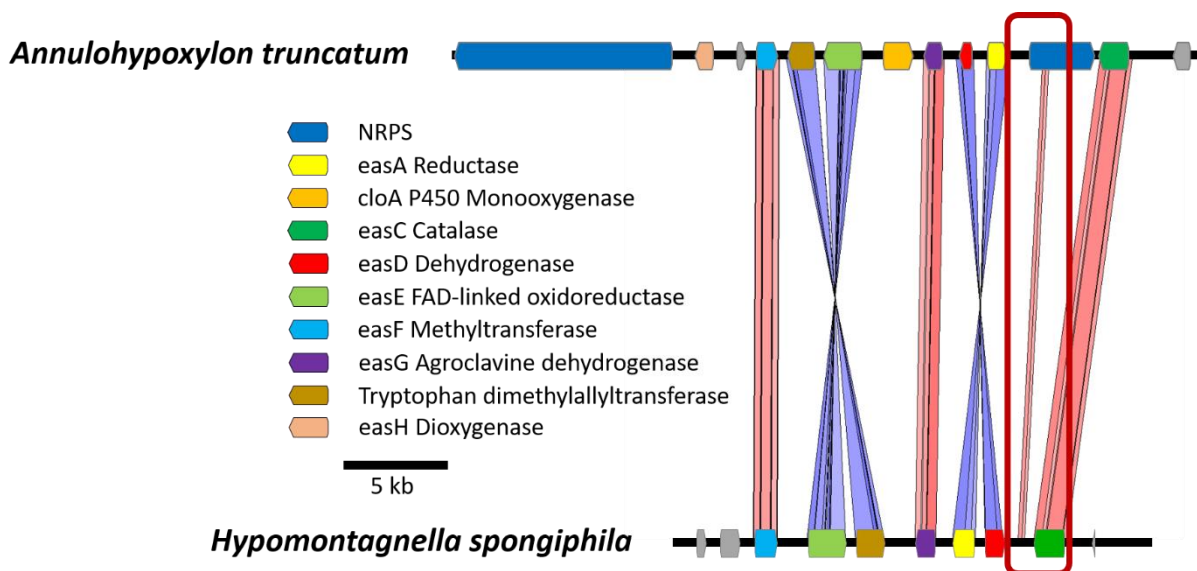

**Fig. S11:** Homology analysis between the ergot alkaloid biosynthetic gene cluster from *A. truncatum* and *Hypom.* *spongiphila* performed with the Artemis Comparison Tool (ACT). The tblastx algorithm identified the remainders of a NRPS gene in *Hypom. spongiphila* highlighted by the red frame.

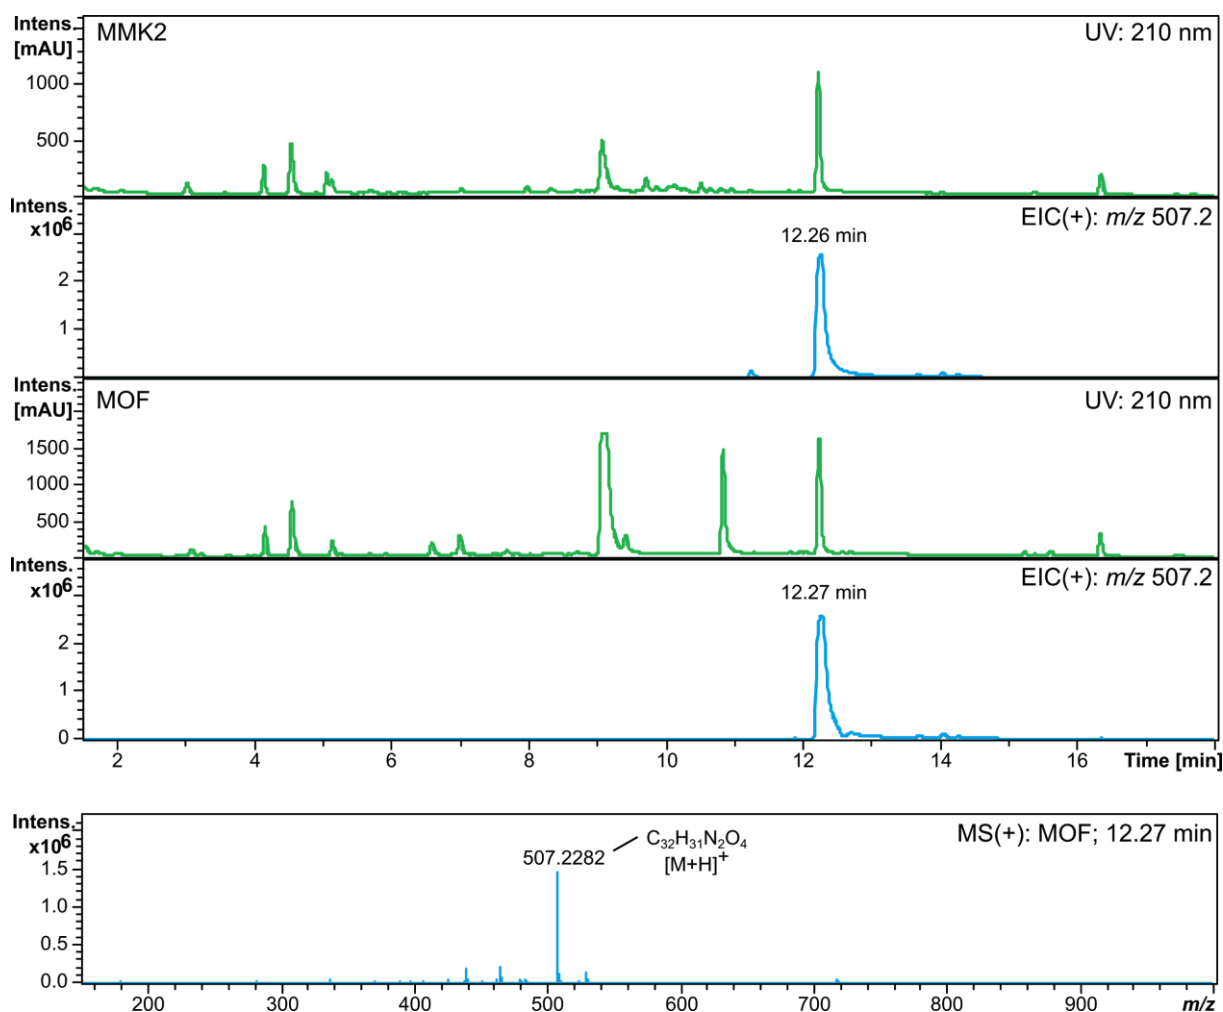

**Fig. S12:** HPLC-MS chromatograms of culture-derived extracts of *Daldinia concentrica* (top panel) and representative MS spectrum of cochliodinol (bottom). Top: green traces, UV chromatograms; blue traces, positive ion mode extracted ion chromatograms [EIC(+)] of  $m/z$  507.2, representing the  $[M+H]^+$  ion corresponding to cochliodinol (MW 506.2 Da). Bottom: representative MS spectrum of cochliodinol (ion formula accuracy: 0.8 ppm)

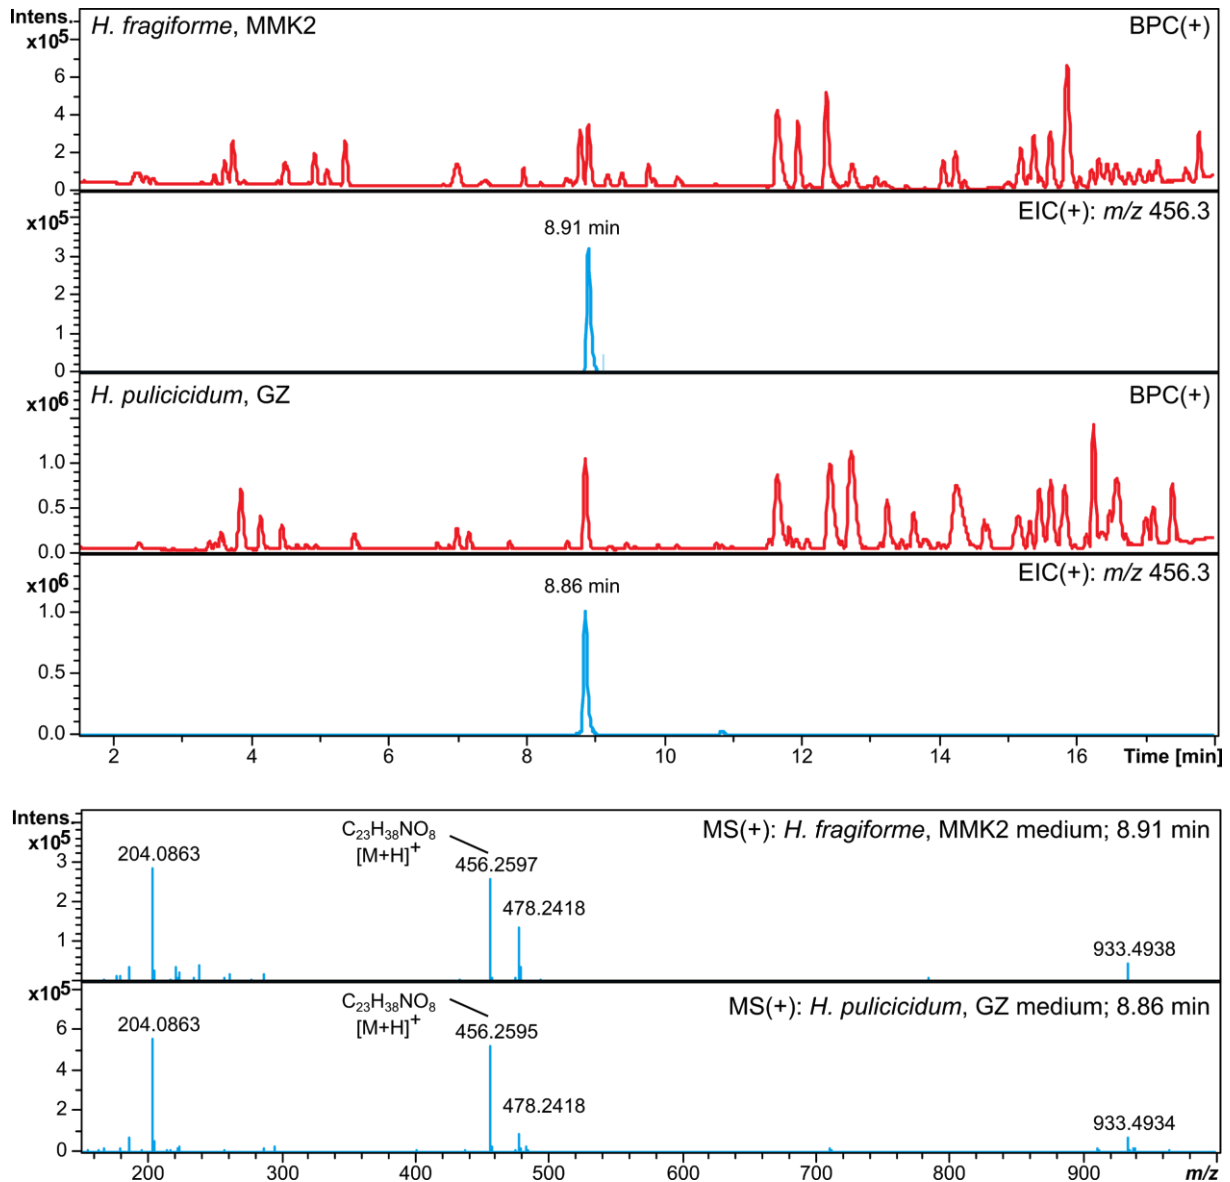

**Fig. S13:** HPLC-MS chromatograms of culture-derived extracts of *Hypoxylon* spp. (top panel) and MS spectra of brasilane E (bottom). Top: red traces, positive ion mode base peak chromatograms [BPC(+)]; blue traces, extracted ion chromatograms (EICs) of  $m/z$  456.3, representing the  $[M+H]^+$  ion corresponding to brasilane E (MW 455.3 Da). Bottom: MS spectra of brasilane E identified from *H. fragiforme* (ion formula accuracy: 1.0 ppm) and *H. pulicidum* (0.6 ppm), respectively.



***Hypoxylon fragiforme***

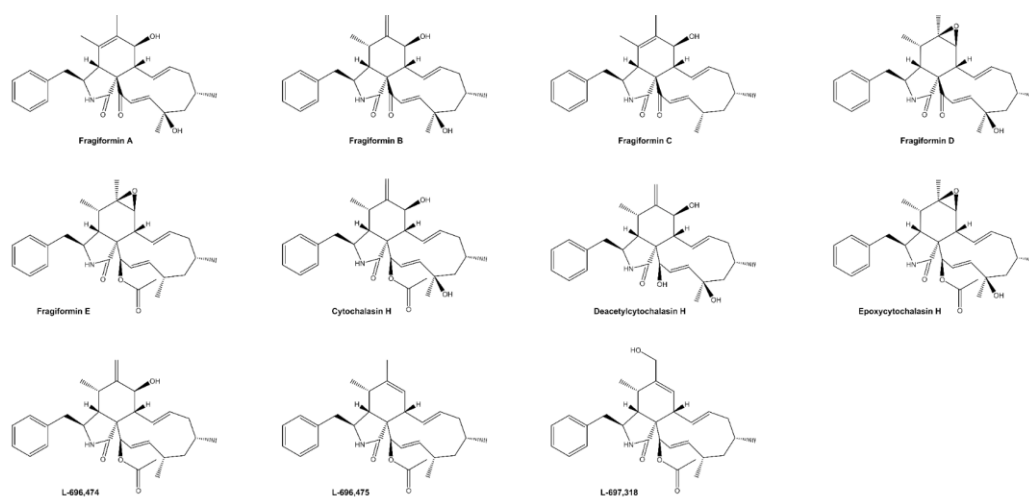

***Daldinia concentrica***

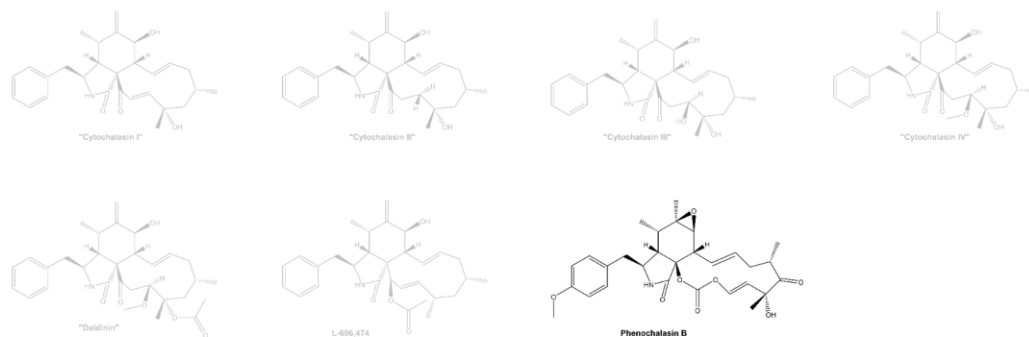

***Xylaria hypoxylon***

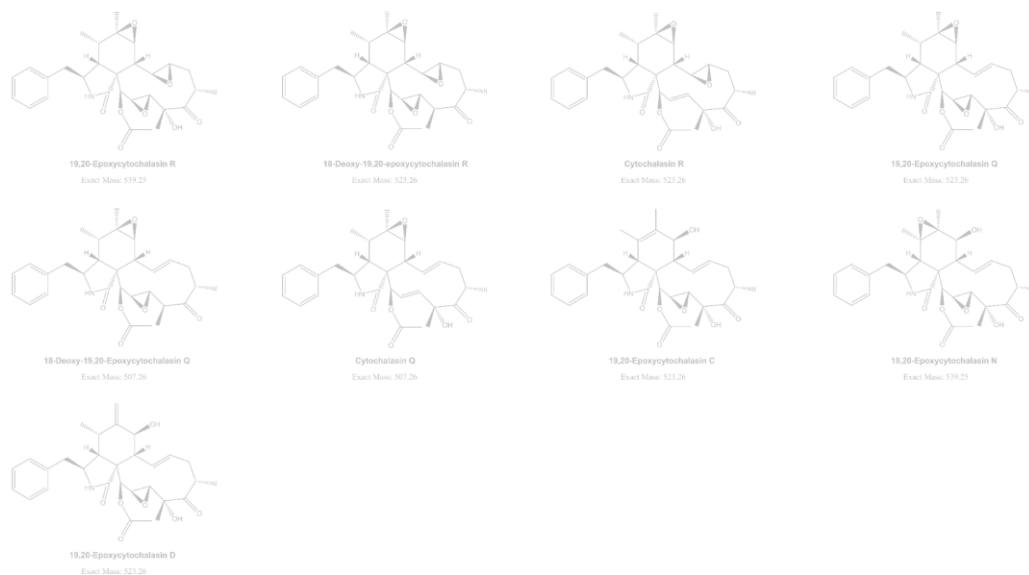

**Fig. S14:** Cytochalasins reported from *H. fragiforme*, *D. concentrica* and *X. hypoxylon*. Grey structures cannot be explained by the identified biosynthetic gene cluster and are likely derived from misidentified fungi or strain-specific cytochalasin BGCs.

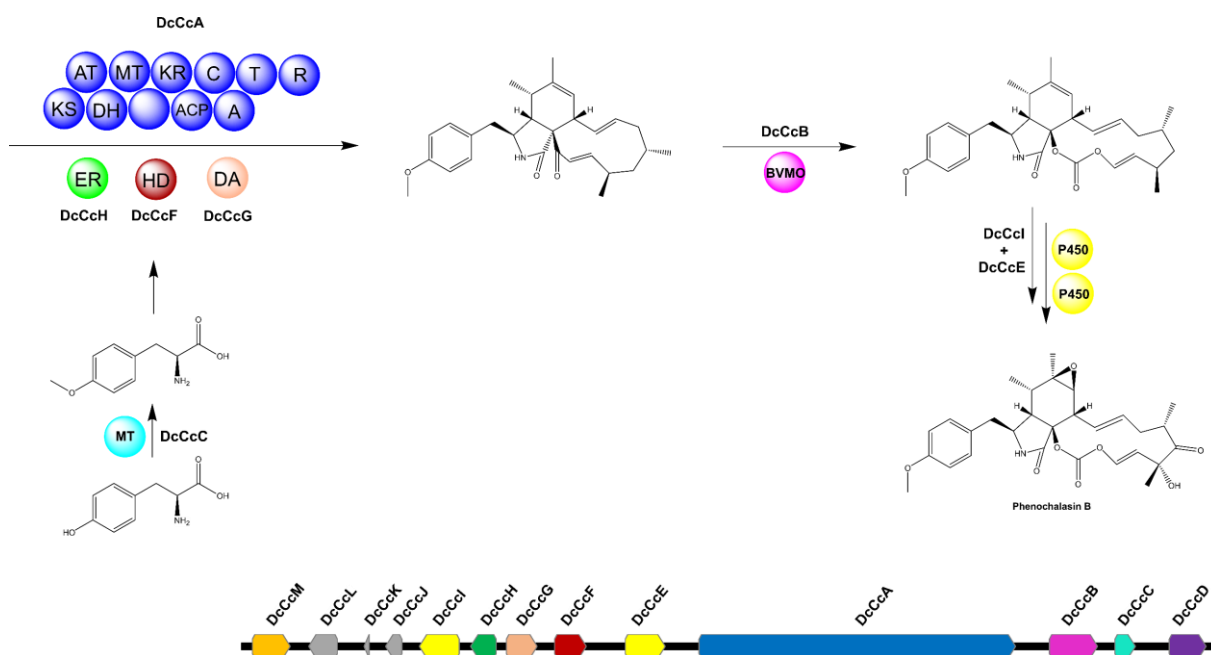

**Fig. S15:** Proposed biosynthetic pathway for the formation of phenochalasin B in *Daldinia concentrica*. Putative intermediates are shown in grey. The biosynthetic gene cluster is shown at the bottom.

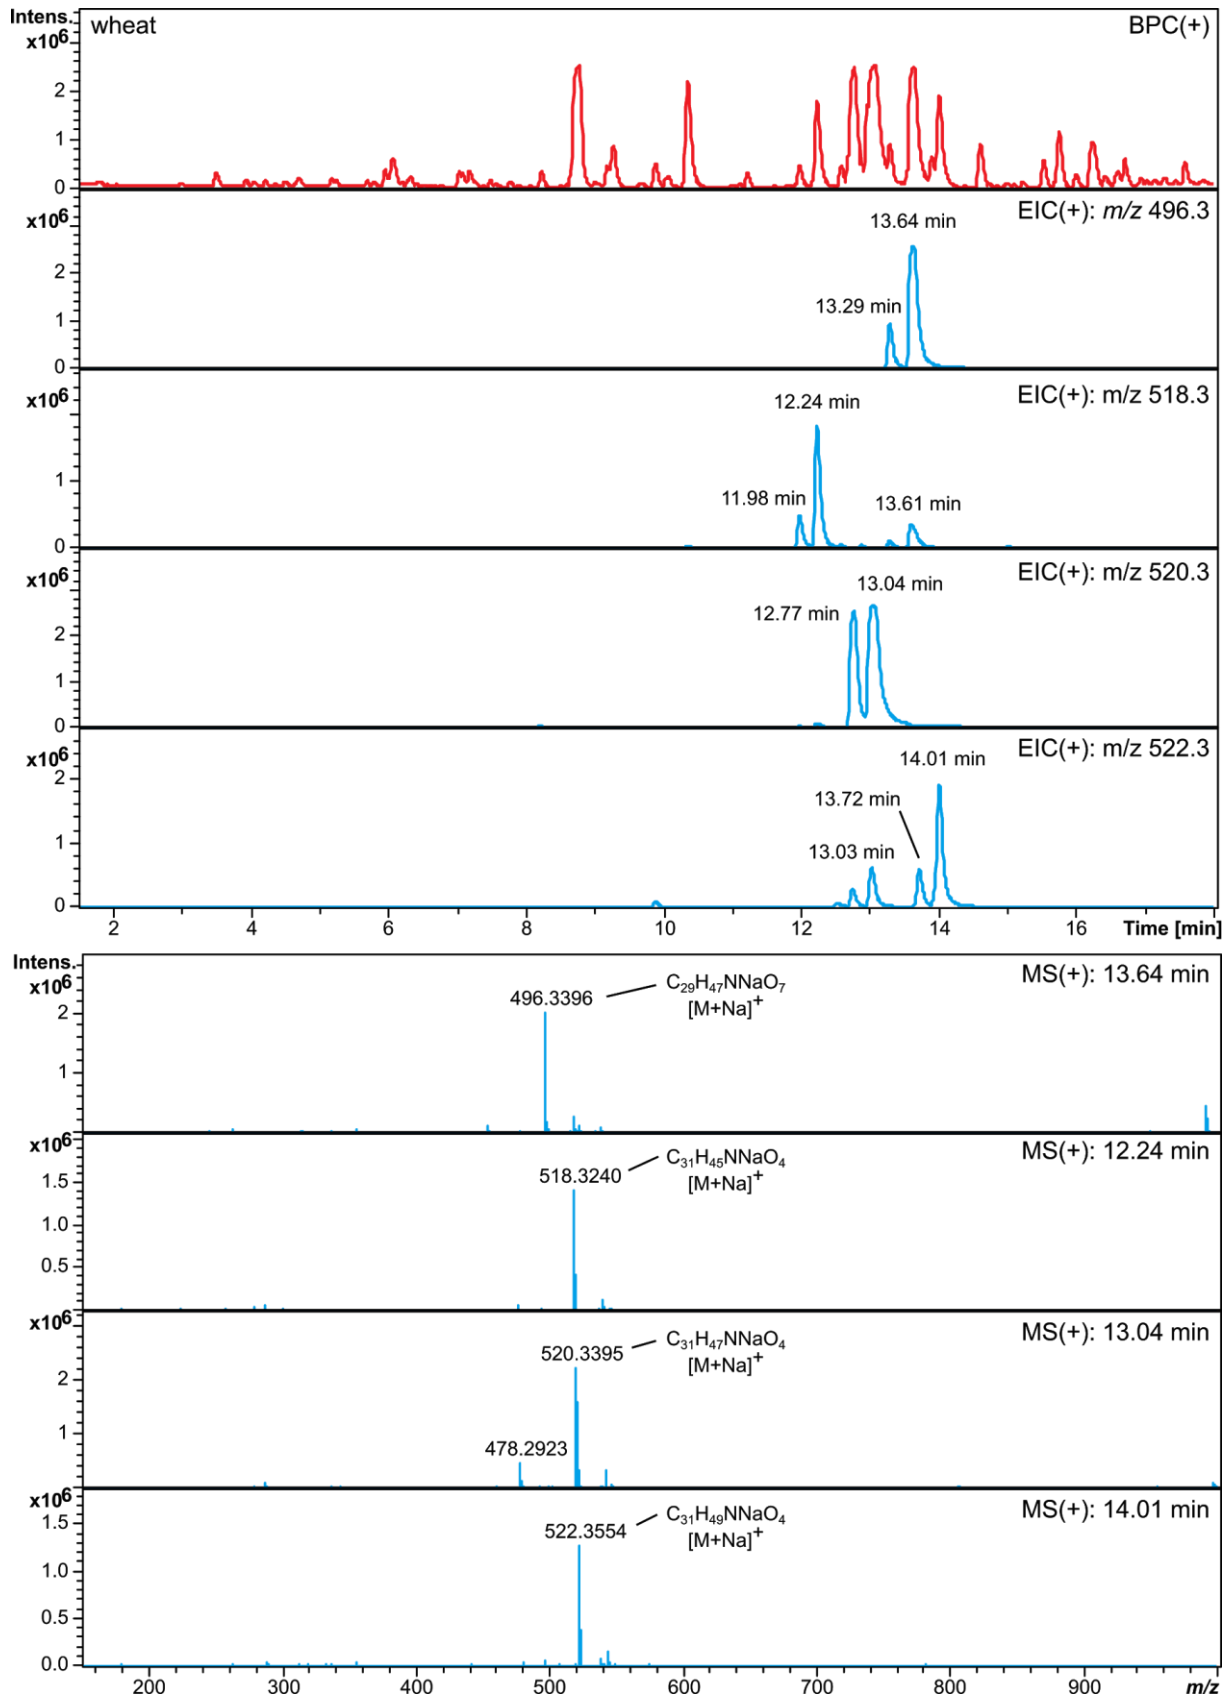

**Fig. S16:** HPLC-MS chromatograms of culture-derived extracts of *Xylaria hypoxylon* (top panel) and MS spectra of peaks tentatively identified as cytochalasans (bottom). Top: red traces, positive ion mode base peak chromatograms [BPC(+)]; blue traces, extracted ion chromatograms [EIC(+)], representing the [M+Na]<sup>+</sup> ions corresponding to putative cytochalasans. Bottom: MS spectra of respective putative cytochalasans (ion formulae accuracy: 0.2, 0.1, 0.0, and 0.0 ppm, respectively).

## References

- Balibar CJ, Howard-Jones AR, Walsh CT (2007). Terrequinone A biosynthesis through L-tryptophan oxidation, dimerization and bisprenylation. *Nature Chemical Biology* **3**: 584–592.
- Becker K, Pfütze S, Kuhnert E, *et al.* (2021). Hybridorubrins A–D: Azaphilone Heterodimers from Stromata of *Hypoxylon fragiforme* and Insights into the Biosynthetic Machinery for Azaphilone Diversification. *Chemistry – A European Journal* **27**: 1438–1450.
- Braesel J, Götze S, Shah F, *et al.* (2015). Three redundant synthetases secure redox-active pigment production in the basidiomycete *Paxillus involutus*. *Chemistry and Biology* **22**: 1325–1334.
- Chen W, Chen R, Liu Q, *et al.* (2017). Orange, red, yellow: biosynthesis of azaphilone pigments in *Monascus* fungi. *Chemical Science* **8**: 4917–4925.
- Chiang YM, Szewczyk E, Davidson AD, *et al.* (2009). A gene cluster containing two fungal polyketide synthases encodes the biosynthetic pathway for a polyketide, asperfuranone, in *Aspergillus nidulans*. *Journal of the American Chemical Society* **131**: 2965–70.
- Davison J, Al Fahad A, Cai M, *et al.* (2012). Genetic, molecular, and biochemical basis of fungal tropolone biosynthesis. *Proceedings of the National Academy of Sciences of the United States of America* **109**: 7642–7647.
- Derntl C, Guzmán-Chávez F, Mello-de-Sousa TM, *et al.* (2017). *In vivo* study of the sorbicillinoid gene cluster in *Trichoderma reesei*. *Frontiers in microbiology* **8**: 2037.
- Forseth RR, Amaike S, Schwenk D, *et al.* (2013). Homologous NRPS-like gene clusters mediate redundant small-molecule biosynthesis in *Aspergillus flavus*. *Angewandte Chemie - International Edition* **52**: 1590–1594.
- Geib E, Gressler M, Viediernikova I, *et al.* (2016). A non-canonical melanin biosynthesis pathway protects *Aspergillus terreus* conidia from environmental stress. *Cell Chemical Biology* **23**: 587–597.
- Gerke J, Bayram Ö, Feussner K, *et al.* (2012). Breaking the silence: Protein stabilization uncovers silenced biosynthetic gene clusters in the fungus *Aspergillus nidulans*. *Applied and Environmental Microbiology* **78**: 8234–8244.
- Guo CJ, Sun WW, Bruno KS, *et al.* (2014). Molecular genetic characterization of terreic acid pathway in *Aspergillus terreus*. *Organic letters* **16**: 5250–3.
- Hühner E, Backhaus K, Kraut R, *et al.* (2018). Production of  $\alpha$ -keto carboxylic acid dimers in yeast by overexpression of NRPS-like genes from *Aspergillus terreus*. *Applied Microbiology and Biotechnology* **102**: 1663–1672.
- Itoh T, Tokunaga K, Matsuda Y, *et al.* (2010). Reconstitution of a fungal meroterpenoid biosynthesis reveals the involvement of a novel family of terpene cyclases. *Nature Chemistry* **2**: 858–864.
- Kahlert L, Cox RJ, Skellam E (2020). The same but different: multiple functions of the fungal flavin dependent monooxygenase SorD from *Penicillium chrysogenum*. *Chemical Communications* **56**: 10934–10937.
- Lin TS, Chiang YM, Wang CCC (2016). Biosynthetic pathway of the reduced polyketide product citreoviridin in *Aspergillus terreus* var. *aureus* revealed by heterologous expression in *Aspergillus nidulans*. *Organic letters* **18**: 1366–9.
- Nofiani R, de Mattos-Shiple K, Lebe KE, *et al.* (2018). Strobilurin biosynthesis in basidiomycete fungi. *Nature Communications* **9**.
- O’Leary SE, Hicks KA, Ealick SE, *et al.* (2009). Biochemical characterization of the HpxO enzyme from

- Klebsiella pneumoniae*, a novel FAD-dependent urate oxidase. *Biochemistry* **48**: 3033–3035.
- Rojas-Aedo JF, Gil-Durán C, Del-Cid A, *et al.* (2017). The biosynthetic gene cluster for andrastin A in *Penicillium roqueforti*. *Frontiers in microbiology* **8**: 813.
- Schneider P, Bouhired S, Hoffmeister D (2008). Characterization of the atromentin biosynthesis genes and enzymes in the homobasidiomycete *Tapinella panuoides*. *Fungal Genetics and Biology* **45**: 1487–1496.
- Schor R, Schotte C, Wibberg D, *et al.* (2018). Three previously unrecognised classes of biosynthetic enzymes revealed during the production of xenovulene A. *Nature Communications* **9**: 1963.
- Semeiks J, Borek D, Otwinowski Z, *et al.* (2014). Comparative genome sequencing reveals chemotype-specific gene clusters in the toxigenic black mold *Stachybotrys*. *BMC genomics* **15**: 590.
- Tsukada K, Shinki S, Kaneko A, *et al.* (2020). Synthetic biology based construction of biological activity-related library of fungal decalin-containing diterpenoid pyrones. *Nature communications* **11**: 1830.
- Wackler B, Lackner G, Chooi YH, *et al.* (2012). Characterization of the *Suillus grevillei* quinone synthetase GreA supports a nonribosomal code for aromatic  $\alpha$ -keto acids. *ChemBioChem* **13**: 1798–1804.
- Wang B, Li X, Yu D, *et al.* (2018). Deletion of the epigenetic regulator GcnE in *Aspergillus niger* FGSC A1279 activates the production of multiple polyketide metabolites. *Microbiological research* **217**: 101–107.
- Winter JM, Sato M, Sugimoto S, *et al.* (2012). Identification and characterization of the chaetoviridin and chaetomugilin gene cluster in *Chaetomium globosum* reveal dual functions of an iterative highly-reducing polyketide synthase. *Journal of the American Chemical Society* **134**: 17900–17903.
- Yaegashi J, Praseuth MB, Tyan SW, *et al.* (2013). Molecular genetic characterization of the biosynthesis cluster of a prenylated isoindolinone alkaloid aspernidine A in *Aspergillus nidulans*. *Organic letters* **15**: 2862–5.
- Yeh HH, Chiang YM, Entwistle R, *et al.* (2012). Molecular genetic analysis reveals that a nonribosomal peptide synthetase-like (NRPS-like) gene in *Aspergillus nidulans* is responsible for microperfuraneone biosynthesis. *Applied Microbiology and Biotechnology* **96**: 739–748.
- Zabala AO, Xu W, Chooi YH, *et al.* (2012). Characterization of a silent azaphilone gene cluster from *Aspergillus niger* ATCC 1015 reveals a hydroxylation-mediated pyran-ring formation. *Chemistry and Biology* **19**: 1049–1059.
- Zaehle C, Gressler M, Shelest E, *et al.* (2014). Terrein biosynthesis in *Aspergillus terreus* and its impact on phytotoxicity. *Chemistry & Biology* **21**: 719–731.
- Zhai Y, Li Y, Zhang J, *et al.* (2019). Identification of the gene cluster for bistropolone-humulene meroterpenoid biosynthesis in *Phoma* sp. *Fungal Genetics and Biology* **129**: 7–15.
